# Supplementary material
Source: HighWire-hosted journal article supplement (https://fmch.bmj.com/content/12/1/e002448)
Supplement: inline-supplementary-material-2 [file inline-supplementary-material-2.pdf]

Supplemental Table 1: Relationship between provider and practice characteristics and discomfort managing pelvic floor disorders

| Variable                            | POP                                                                |                               | SUI                                                                 |                                                     | OAB                                                  |                                                       | FI                                                                 |                               |
|-------------------------------------|--------------------------------------------------------------------|-------------------------------|---------------------------------------------------------------------|-----------------------------------------------------|------------------------------------------------------|-------------------------------------------------------|--------------------------------------------------------------------|-------------------------------|
|                                     | COR<br>(95% CI)<br>p-value                                         | AOR<br>(95% CI)<br>p-value    | COR<br>(95% CI)<br>p-value                                          | AOR<br>(95% CI)<br>p-value                          | COR<br>(95% CI)<br>p-value                           | AOR<br>(95% CI)<br>p-value                            | COR<br>(95% CI)<br>p-value                                         | AOR<br>(95% CI)<br>p-value    |
| Age                                 |                                                                    |                               |                                                                     |                                                     |                                                      |                                                       |                                                                    |                               |
| ≥ 45 years old                      | Ref                                                                |                               | Ref                                                                 |                                                     | Ref                                                  |                                                       | Ref                                                                |                               |
| < 45 years old                      | <b>3.31</b><br><b>(1.55, 7.06)</b><br><b>0.002<sup>&amp;</sup></b> |                               | <b>8.89</b><br><b>(1.15, 68.90)</b><br><b>0.037<sup>&amp;</sup></b> |                                                     | 4.13<br>(0.91, 18.76)<br>0.066                       |                                                       | <b>3.04</b><br><b>(1.48, 6.22)</b><br><b>0.002<sup>&amp;</sup></b> |                               |
| Gender                              |                                                                    |                               |                                                                     |                                                     |                                                      |                                                       |                                                                    |                               |
| Male                                | Ref                                                                |                               | Ref                                                                 |                                                     | Ref                                                  |                                                       | Ref                                                                |                               |
| Female                              | 1.20<br>(0.58, 2.47)<br>0.619                                      |                               | 1.39<br>(0.43, 4.48)<br>0.586                                       |                                                     | 2.11<br>(0.58, 7.67)<br>0.259                        |                                                       | 1.20<br>(0.58, 2.50)<br>0.622                                      |                               |
| Specialty                           |                                                                    |                               |                                                                     |                                                     |                                                      |                                                       |                                                                    |                               |
| Geriatric                           | Ref                                                                |                               | Ref                                                                 |                                                     | Ref                                                  |                                                       | Ref                                                                |                               |
| Family Medicine                     | 1.64<br>(0.76, 3.54)<br>0.206 <sup>*</sup>                         |                               | 1.43<br>(0.36, 5.72)<br>0.606                                       | 2.03<br>(0.45, 9.14)<br>0.357                       | 3.24<br>(0.69, 15.31)<br>0.138                       | 3.19<br>(0.40, 25.27)<br>0.270                        | <b>2.48</b><br><b>(1.17, 5.28)</b><br><b>0.018</b>                 | 2.20<br>(0.96, 5.03)<br>0.062 |
| Internal Medicine                   | Perfectly predicts discomfort <sup>*</sup>                         |                               | <b>9.76</b><br><b>(1.89, 50.35)</b><br><b>0.006</b>                 | <b>7.55</b><br><b>(1.20, 47.50)</b><br><b>0.031</b> | <b>10.75</b><br><b>(1.67, 68.89)</b><br><b>0.012</b> | <b>16.93</b><br><b>(2.27, 126.02)</b><br><b>0.006</b> | 1.83<br>(0.47, 7.13)<br>0.384                                      | 1.64<br>(0.39, 6.88)<br>0.501 |
| Multi-specialty                     | 1.07<br>(0.28, 4.16)<br>0.921 <sup>*</sup>                         |                               | 2.73<br>(0.40, 18.61)<br>0.304                                      | 1.66<br>(0.22, 12.55)<br>0.620                      | 1.95<br>(0.16, 23.58)<br>0.598                       | 2.78<br>(0.21, 37.07)<br>0.440                        | 2.79<br>(0.65, 11.88)<br>0.166                                     | 1.72<br>(0.38, 7.85)<br>0.481 |
| Level of training/Years of Practice |                                                                    |                               |                                                                     |                                                     |                                                      |                                                       |                                                                    |                               |
| >20 years                           | Ref                                                                |                               | Ref                                                                 |                                                     | Ref                                                  |                                                       | Ref                                                                |                               |
| 11-20 years                         | 1.62<br>(0.50, 5.24)<br>0.417                                      | 1.52<br>(0.46, 4.97)<br>0.489 | 1.19 (0.071, 19.86)<br>0.906                                        | 1.16<br>(0.07, 20.25)<br>0.921                      | 1.22<br>(0.072, 20.47)<br>0.889                      |                                                       | 1.79<br>(0.64, 4.96)<br>0.266                                      | 1.39<br>(0.48, 4.06)<br>0.543 |

|                    |                                              |                                              |                                               |                                |                                |  |                                              |                                              |
|--------------------|----------------------------------------------|----------------------------------------------|-----------------------------------------------|--------------------------------|--------------------------------|--|----------------------------------------------|----------------------------------------------|
| 1-10 years         | <b>4.82</b><br>(1.74, 13.35)<br><b>0.002</b> | <b>4.41</b><br>(1.58, 12.34)<br><b>0.005</b> | 3.90<br>(0.43, 35.09)<br>0.224                | 4.11<br>(0.43, 39.32)<br>0.220 | 6.95<br>(0.83, 58.49)<br>0.075 |  | <b>5.87</b><br>(2.16, 15.94)<br><b>0.001</b> | <b>4.82</b><br>(1.72, 13.56)<br><b>0.003</b> |
| PGY 1-7            | <b>5.28</b><br>(1.90, 14.64)<br><b>0.001</b> | <b>4.54</b><br>(1.60, 12.85)<br><b>0.004</b> | <b>10.35</b><br>(1.26, 84.82)<br><b>0.029</b> | 8.40<br>(0.95, 74.13)<br>0.056 | 7.14<br>(0.85, 60.11)<br>0.071 |  | <b>3.08</b><br>(1.19, 7.94)<br><b>0.020</b>  | <b>2.98</b><br>(1.11, 8.03)<br><b>0.030</b>  |
| Practice setting   |                                              |                                              |                                               |                                |                                |  |                                              |                                              |
| Urban              | Ref                                          |                                              | Ref                                           |                                | Ref                            |  | Ref                                          |                                              |
| Suburban           | 0.59<br>(0.26, 1.32)<br>0.198                |                                              | 0.56<br>(0.15, 2.09)<br>0.393                 |                                | 0.57<br>(0.15, 2.12)<br>0.402  |  | 1.32<br>(0.58, 3.01)<br>0.504                |                                              |
| Rural or tribal    | 0.54<br>(0.17, 1.69)<br>0.291                |                                              | 0.44<br>(0.054, 3.65)<br>0.450                |                                | 0.45<br>(0.055, 3.69)<br>0.456 |  | 0.91<br>(0.30, 2.76)<br>0.868                |                                              |
| Type of Practice   |                                              |                                              |                                               |                                |                                |  |                                              |                                              |
| Academic           | Ref                                          |                                              | Ref                                           |                                | Ref                            |  | Ref                                          |                                              |
| Private Practice   | 1.06<br>(0.48, 2.33)<br>0.887                |                                              | 0.75<br>(0.20, 2.86)<br>0.671                 |                                | 1.30<br>(0.37, 4.54)<br>0.677  |  | 0.88<br>(0.39, 1.96)<br>0.749                |                                              |
| Other              | 1.34<br>(0.51, 3.52)<br>0.551                |                                              | 1.17<br>(0.52, 6.39)<br>0.351                 |                                | 3.06<br>(0.91, 10.31)<br>0.072 |  | 2.61<br>(0.81, 8.39)<br>0.107                |                                              |
| Region of Practice |                                              |                                              |                                               |                                |                                |  |                                              |                                              |
| Mid-Atlantic       | Ref                                          |                                              | Ref                                           |                                | Ref                            |  | Ref                                          |                                              |
| Northeast          | 2.33<br>(0.88, 6.18)<br>0.089                |                                              | 0.77<br>(0.14, 4.13)<br>0.763                 |                                | 1.04<br>(0.25, 4.41)<br>0.957  |  | 1.12<br>(0.40, 3.22)<br>0.822                |                                              |
| South              | 0.44<br>(0.13, 1.52)<br>0.196                |                                              | 0.47<br>(0.053, 4.19)<br>0.501                |                                | 0.40<br>(0.047, 3.52)<br>0.412 |  | 0.66<br>(0.22, 1.93)<br>0.446                |                                              |
| Midwest            | 1.06<br>(0.36, 3.16)                         |                                              | 1.70<br>(0.38, 7.62)                          |                                | 0.43<br>(0.049, 3.74)          |  | 0.37<br>(0.12, 1.11)                         |                                              |

|                                               |                                |      |                                  |      |                                  |  |                                |  |
|-----------------------------------------------|--------------------------------|------|----------------------------------|------|----------------------------------|--|--------------------------------|--|
|                                               | 0.916                          |      | 0.488                            |      | 0.443                            |  | 0.077                          |  |
| Southwest                                     | 8.33<br>(0.91, 76.28)<br>0.061 |      | Perfectly<br>predicts<br>comfort |      | Perfectly<br>predicts<br>comfort |  | 2.63<br>(0.29, 24.09)<br>0.392 |  |
| West                                          | 1.41<br>(0.54, 3.71)<br>0.486  |      | 1.70<br>(0.43, 6.67)<br>0.447    |      | 1.46<br>(0.38, 5.52)<br>0.580    |  | 1.20<br>(0.43, 3.40)<br>0.728  |  |
| Number of patients per week by quartile       |                                |      |                                  |      |                                  |  |                                |  |
| 1 (2-20 patients)                             | Ref                            |      | Ref                              |      | Ref                              |  | Ref                            |  |
| 2 (21-30 patients)                            | 0.72<br>(0.29, 1.83)<br>0.495  |      | 0.29<br>(0.058, 1.41)<br>0.123   |      | 0.68<br>(0.16, 2.87)<br>0.602    |  | 1.05<br>(0.41, 2.68)<br>0.920  |  |
| 3 (31-55 patients)                            | 0.87<br>(0.37, 2.07)<br>0.752  |      | 0.24<br>(0.050, 1.18)<br>0.080   |      | 0.18<br>(0.021, 1.50)<br>0.111   |  | 1.25<br>(0.51, 3.07)<br>0.621  |  |
| 4 (56-200 patients)                           | 0.74<br>(0.31, 1.76)<br>0.498  |      | 0.48<br>(0.14, 1.69)<br>0.255    |      | 1.43<br>(0.46, 4.51)<br>0.538    |  | 2.30<br>(0.89, 5.95)<br>0.084  |  |
| Percentage of patients that are female        |                                |      |                                  |      |                                  |  |                                |  |
| <50%                                          | Ref                            |      | Ref                              |      | Ref                              |  | Ref                            |  |
| ≥50%                                          | 0.37<br>(0.088, 1.52)<br>0.167 |      | 0.28<br>(0.064, 1.18)<br>0.082   |      | 0.50<br>(0.098, 2.58)<br>0.411   |  | 1.82<br>(0.50, 6.58)<br>0.364  |  |
| Age of patient population                     |                                |      |                                  |      |                                  |  |                                |  |
| <50% above 40                                 | Ref                            |      | Ref                              |      | Ref                              |  | Ref                            |  |
| ≥ 50% above 40                                | 1.29<br>(0.66, 2.49)<br>0.456  |      | 1.92<br>(0.65, 5.71)<br>0.238    |      | 0.83<br>(0.31, 2.25)<br>0.719    |  | 0.97<br>(0.49, 1.91)<br>0.929  |  |
| Percentage of patient referred for any reason |                                |      |                                  |      |                                  |  |                                |  |
| ≤10%                                          | Ref                            |      | Ref                              |      | Ref                              |  | Ref                            |  |
| 11-24%                                        | <b>2.08</b>                    | 1.75 | 0.96                             | 0.53 | 1.16                             |  | 1.50                           |  |

|                                                      |                                     |                               |                                              |                               |                                              |                                              |                               |  |
|------------------------------------------------------|-------------------------------------|-------------------------------|----------------------------------------------|-------------------------------|----------------------------------------------|----------------------------------------------|-------------------------------|--|
|                                                      | <b>(1.04, 4.17)</b><br><b>0.038</b> | (0.84, 3.65)<br>0.133         | (0.31, 3.02)<br>0.945                        | (0.15, 1.89)<br>0.328         | (0.41, 3.29)<br>0.779                        |                                              | (0.74, 3.05)<br>0.263         |  |
| ≥ 25%                                                | 2.52<br>(0.84, 7.59)<br>0.101       | 1.77<br>(0.55, 5.67)<br>0.335 | <b>4.22</b><br>(1.13, 15.70)<br><b>0.032</b> | 2.13<br>(0.46, 9.86)<br>0.333 | 1.16<br>(0.22, 6.07)<br>0.860                |                                              | 1.79<br>(0.51, 6.24)<br>0.364 |  |
| Number of pelvic exams per week by quartile          |                                     |                               |                                              |                               |                                              |                                              |                               |  |
| 1 (0-0.5 exams)                                      | Ref                                 |                               | Ref                                          |                               | Ref                                          |                                              | Ref                           |  |
| 2 (1-2.5 exams)                                      | 0.76<br>(0.31, 1.85)<br>0.548       |                               | 1.13<br>(0.33, 3.84)<br>0.851                |                               | 1.48<br>(0.37, 5.96)<br>0.583                | 1.06<br>(0.21, 5.43)<br>0.944                | 1.98<br>(0.78, 5.06)<br>0.152 |  |
| 3 (3-10 exams)                                       | 0.76<br>(0.32, 1.78)<br>0.527       |                               | 0.44<br>(0.10, 1.88)<br>0.268                |                               | 0.22<br>(0.024, 2.12)<br>0.193               | 0.18<br>(0.014, 2.33)<br>0.190               | 1.95<br>(0.81, 4.68)<br>0.136 |  |
| 4 (11-80 exams)                                      | 0.55<br>(0.21, 1.48)<br>0.241       |                               | 0.72<br>(0.16, 3.15)<br>0.663                |                               | <b>3.90</b><br>(1.05, 14.54)<br><b>0.043</b> | 3.55<br>(0.49, 26.02)<br>0.212               | 1.82<br>(0.67, 4.96)<br>0.243 |  |
| Correctly estimated pelvic floor disorder prevalence |                                     |                               |                                              |                               |                                              |                                              |                               |  |
| Yes                                                  | Ref                                 |                               | Ref                                          |                               | Ref                                          |                                              | Ref                           |  |
| No                                                   | 0.83<br>(0.33, 2.10)<br>0.697       |                               | 1.40<br>(0.47, 4.18)<br>0.542                |                               | <b>3.65</b><br>(1.01, 13.22)<br><b>0.048</b> | <b>4.77</b><br>(1.20, 18.93)<br><b>0.026</b> | 1.46<br>(0.61, 3.50)<br>0.394 |  |

Provider discomfort was defined as a dichotomous variable, whereby all providers that responded that they were indifferent, somewhat uncomfortable, and very uncomfortable managing pelvic floor disorders on the Likert scale were designated as having discomfort managing each disorder.

\* variables that were not included in multivariate logistic regression, despite statistical significance in chi-square analysis, as variable perfectly predicted outcome

& variables not included in multivariate analysis due to multicollinearity (Spearman coefficient 0.652, p-value 0.000)

Abbreviations: POP, pelvic organ prolapse; SUI, stress urinary incontinence; OAB, overactive bladder; FI, fecal incontinence; COR, crude odds ratio; AOR, adjusted odds ratio; Ref, reference category; CI, confidence interval

Supplemental Table 2: Relationship between provider and practice characteristics and difficulty referring for pelvic floor disorders

| Variable                            | POP                            |                          | SUI                            |                          | OAB                            |                          | FI                             |                          |
|-------------------------------------|--------------------------------|--------------------------|--------------------------------|--------------------------|--------------------------------|--------------------------|--------------------------------|--------------------------|
|                                     | COR<br>95% CI<br>p-value       | AOR<br>95% CI<br>p-value |
| Age                                 |                                |                          |                                |                          |                                |                          |                                |                          |
| ≥ 45 years old                      | Ref                            |                          | Ref                            |                          | Ref                            |                          | Ref                            |                          |
| < 45 years old                      | 1.06<br>(0.41, 2.79)<br>0.898  |                          | 1.37<br>(0.46, 4.05)<br>0.571  |                          | 1.83<br>(0.57, 5.86)<br>0.308  |                          | 0.90<br>(0.41, 1.96)<br>0.787  |                          |
| Gender                              |                                |                          |                                |                          |                                |                          |                                |                          |
| Male                                | Ref                            |                          | Ref                            |                          | Ref                            |                          | Ref                            |                          |
| Female                              | 1.14<br>(0.42, 3.12)<br>0.799  |                          | 1.48<br>(0.46, 4.74)<br>0.513  |                          | 2.25<br>(0.62, 8.18)<br>0.217  |                          | 0.71<br>(0.32, 1.60)<br>0.414  |                          |
| Specialty                           |                                |                          |                                |                          |                                |                          |                                |                          |
| Geriatric                           | Ref                            |                          | Ref                            |                          | Ref                            |                          | Ref                            |                          |
| Family Medicine                     | 1.37<br>(0.49, 3.84)<br>0.541  |                          | 0.98<br>(0.34, 2.86)           |                          | 1.34<br>(0.44, 4.10)<br>0.606  |                          | 0.81<br>(0.35, 1.87)<br>0.627  |                          |
| Internal Medicine                   | 0.58<br>(0.062, 5.31)<br>0.626 |                          | Perfectly<br>predicts<br>ease  |                          | 0.69<br>(0.073, 6.55)<br>0.747 |                          | 0.24<br>(0.027, 2.09)<br>0.196 |                          |
| Multi-specialty                     | 0.58<br>(0.062, 5.31)<br>0.626 |                          | 1.27<br>(0.22, 7.25)<br>0.791  |                          | 0.69<br>(0.073, 6.55)<br>0.747 |                          | 1.44<br>(0.35, 5.98)<br>0.619  |                          |
| Level of training/Years of Practice |                                |                          |                                |                          |                                |                          |                                |                          |
| >20 years                           | Ref                            |                          | Ref                            |                          | Ref                            |                          | Ref                            |                          |
| 11-20 years                         | 0.45<br>(0.080, 2.50)<br>0.359 |                          | 0.28<br>(0.029, 2.64)<br>0.265 |                          | 0.38 (0.038,<br>3.93) 0.420    |                          | 0.70<br>(0.23, 2.16)<br>0.534  |                          |

|                    |                                                     |                                |                                                     |                                                     |                                                     |                                                     |                                                    |                               |
|--------------------|-----------------------------------------------------|--------------------------------|-----------------------------------------------------|-----------------------------------------------------|-----------------------------------------------------|-----------------------------------------------------|----------------------------------------------------|-------------------------------|
| 1-10 years         | 1.66<br>(0.51, 5.40)<br>0.402                       |                                | 2.14<br>(0.61, 7.54)<br>0.235                       |                                                     | 2.94<br>(0.74, 11.70)<br>0.126                      |                                                     | 0.86<br>(0.32, 2.31)<br>0.760                      |                               |
| PGY 1-7            | 0.89 (0.25,<br>3.21) 0.862                          |                                | 0.77<br>(0.18, 3.33)<br>0.726                       |                                                     | 1.32<br>(0.29, 5.95)<br>0.722                       |                                                     | 0.62<br>(0.21, 1.80)<br>0.375                      |                               |
| Practice setting   |                                                     |                                |                                                     |                                                     |                                                     |                                                     |                                                    |                               |
| Urban              | Ref                                                 |                                | Ref                                                 |                                                     | Ref                                                 |                                                     | Ref                                                |                               |
| Suburban           | 0.96<br>(0.32, 2.89)<br>0.952                       |                                | <b>2.86</b><br><b>(1.01,8.10)</b><br><b>0.048</b>   | <b>3.29</b><br><b>(1.03, 10.52)</b><br><b>0.045</b> | 2.28<br>(0.79,6.57)<br>0.126                        |                                                     | 2.04<br>(0.85,4.90)<br>0.108                       |                               |
| Rural or tribal    | 1.45<br>(0.37, 5.76)<br>0.597                       |                                | 1.54<br>(0.30,7.92)<br>0.606                        | 0.81<br>(0.13, 4.85)<br>0.817                       | 1.35<br>(0.27,6.88)<br>0.715                        |                                                     | 1.80<br>(0.54,5.96)<br>0.337                       |                               |
| Type of Practice   |                                                     |                                |                                                     |                                                     |                                                     |                                                     |                                                    |                               |
| Academic           | Ref                                                 |                                | Ref                                                 |                                                     | Ref                                                 |                                                     | Ref                                                |                               |
| Private Practice   | <b>3.01</b><br><b>(1.05, 8.58)</b><br><b>0.039</b>  | 2.99<br>(0.71, 12.58)<br>0.134 | 1.0<br>(0.25, 3.95)<br>1.00                         | 0.69<br>(0.16, 2.93)<br>0.617                       | 1.11<br>(0.28, 4.47)<br>0.881                       | 0.81<br>(0.20, 3.32)<br>0.764                       | 0.75<br>(0.27, 2.07)<br>0.576                      | 0.47<br>(0.15, 1.47)<br>0.192 |
| Other              | <b>4.19</b><br><b>(1.29, 13.60)</b><br><b>0.017</b> | 3.39<br>(0.71, 16.09)<br>0.125 | <b>4.83</b><br><b>(1.55, 15.08)</b><br><b>0.007</b> | <b>4.77</b><br><b>(1.34, 17.03)</b><br><b>0.016</b> | <b>7.17</b><br><b>(2.27, 22.66)</b><br><b>0.001</b> | <b>5.51</b><br><b>(1.69, 17.96)</b><br><b>0.005</b> | <b>3.18</b><br><b>(1.14, 8.85)</b><br><b>0.027</b> | 1.72<br>(0.53, 5.61)<br>0.369 |
| Region of Practice |                                                     |                                |                                                     |                                                     |                                                     |                                                     |                                                    |                               |
| Mid-Atlantic       | Ref                                                 |                                | Ref                                                 |                                                     | Ref                                                 |                                                     | Ref                                                |                               |
| Northeast          | 0.20<br>(0.024, 1.69)<br>0.141                      |                                | Perfectly<br>predicts<br>ease                       |                                                     | 0.29<br>(0.034, 2.52)<br>0.263*                     |                                                     | 0.32<br>(0.065, 1.56)<br>0.159                     |                               |
| South              | 0.88<br>(0.22, 3.61)<br>0.860                       |                                | 0.27<br>(0.032, 2.28)<br>0.229                      |                                                     | 0.42<br>(0.048, 3.68)<br>0.433*                     |                                                     | 1.13<br>(0.34, 3.79)<br>0.842                      |                               |

|                                               |                                                     |                                |                                                     |  |                                 |  |                                                     |                                                     |
|-----------------------------------------------|-----------------------------------------------------|--------------------------------|-----------------------------------------------------|--|---------------------------------|--|-----------------------------------------------------|-----------------------------------------------------|
| Midwest                                       | 0.28<br>(0.033, 2.32)<br>0.237                      |                                | Perfectly predicts ease                             |  | Perfectly predicts ease*        |  | 0.63<br>(0.15, 2.53)<br>0.512                       |                                                     |
| Southwest                                     | 0.94<br>(0.099, 8.94)<br>0.957                      |                                | 0.92<br>(0.097, 8.76)<br>0.942                      |  | 1.34<br>(0.14, 13.25)<br>0.801* |  | 0.68<br>(0.070, 6.60)<br>0.738                      |                                                     |
| West                                          | 1.24<br>(0.37, 4.10)<br>0.728                       |                                | 1.21<br>(0.36, 4.02)<br>0.755                       |  | 2.76<br>(0.84, 9.05)<br>0.093*  |  | 2.47<br>(0.86, 7.07)<br>0.093                       |                                                     |
| Number of patients per week by quartile       |                                                     |                                |                                                     |  |                                 |  |                                                     |                                                     |
| 1 (2-20 patients)                             | Ref                                                 |                                | Ref                                                 |  | Ref                             |  | Ref                                                 |                                                     |
| 2 (21-30 patients)                            | 3.42<br>(0.91, 12.91)<br>0.069                      | 2.30<br>(0.55, 9.61)<br>0.252  | 3.0<br>(0.77, 11.70)<br>0.114                       |  | 0.92<br>(0.21, 4.00)<br>0.908   |  | 2.17<br>(0.68, 6.88)<br>0.190                       | 2.63<br>(0.76, 9.09)<br>0.126                       |
| 3 (31-55 patients)                            | 0.32<br>(0.034, 3.01)<br>0.320                      | 0.16<br>(0.014, 1.73)<br>0.131 | Perfectly predicts ease                             |  | 0.21<br>(0.024, 1.82)<br>0.157  |  | 1.29<br>(0.38, 4.30)<br>0.683                       | 1.59<br>(0.40, 6.21)<br>0.509                       |
| 4 (56-200 patients)                           | <b>4.76</b><br><b>(1.37, 16.48)</b><br><b>0.014</b> | 2.24<br>(0.53, 9.48)<br>0.273  | <b>3.98</b><br><b>(0.031, 0.24)</b><br><b>0.033</b> |  | 2.64<br>(0.84, 8.29)<br>0.096   |  | <b>5.14</b><br><b>(1.80, 14.73)</b><br><b>0.002</b> | <b>5.04</b><br><b>(1.50, 16.92)</b><br><b>0.009</b> |
| Percentage of patients that are female        |                                                     |                                |                                                     |  |                                 |  |                                                     |                                                     |
| <50%                                          | Ref                                                 |                                | Ref                                                 |  | Ref                             |  | Ref                                                 |                                                     |
| ≥ 50%                                         | 0.69<br>(0.14, 3.50)<br>0.658                       |                                | 0.55<br>(0.11, 2.82)<br>0.476                       |  | 0.57<br>(0.11, 2.89)<br>0.495   |  | 0.92<br>(0.22, 3.75)<br>0.905                       |                                                     |
| Age of patient population                     |                                                     |                                |                                                     |  |                                 |  |                                                     |                                                     |
| <50% above 40                                 | Ref                                                 |                                | Ref                                                 |  | Ref                             |  | Ref                                                 |                                                     |
| ≥ 50% above 40                                | 0.46<br>(0.19, 1.12)<br>0.087                       |                                | 0.54<br>(0.20, 1.42)<br>0.209                       |  | 0.67<br>(0.25, 1.76)<br>0.412   |  | 0.61<br>(0.28, 1.31)<br>0.202                       |                                                     |
| Percentage of patient referred for any reason |                                                     |                                |                                                     |  |                                 |  |                                                     |                                                     |
| ≤10%                                          | Ref                                                 |                                | Ref                                                 |  | Ref                             |  | Ref                                                 |                                                     |

|                                                                |                               |      |                                |  |                                |  |                               |  |
|----------------------------------------------------------------|-------------------------------|------|--------------------------------|--|--------------------------------|--|-------------------------------|--|
| 11-24%                                                         | 0.84<br>(0.34, 2.07)<br>0.706 |      | 1.31<br>(0.47, 3.64)<br>0.601  |  | 1.47<br>(0.54, 3.99)<br>0.453  |  | 0.90<br>(0.41, 1.98)<br>0.798 |  |
| ≥ 25%                                                          | Perfectly<br>predict<br>ease  |      | 1.13<br>(0.22, 5.88)<br>0.889  |  | 0.51<br>(0.059, 4.38)<br>0.538 |  | 0.79<br>(0.19, 3.24)<br>0.743 |  |
| Number of pelvic exams per week by quartile                    |                               |      |                                |  |                                |  |                               |  |
| 1 (0-0.5 exams)                                                | Ref                           |      | Ref                            |  | Ref                            |  | Ref                           |  |
| 2 (1-2.5 exams)                                                | 0.20<br>(0.04, 1.01)<br>0.052 |      | 0.53<br>(0.12, 2.29)<br>0.394  |  | 0.51<br>(0.12, 2.23)<br>0.374  |  | 0.48<br>(0.16, 1.48)<br>0.201 |  |
| 3 (3-10 exams)                                                 | 0.47<br>(0.14, 1.54)<br>0.213 |      | 0.45<br>(0.10, 1.93)<br>0.283  |  | 0.45<br>(0.10, 1.93)<br>0.282  |  | 0.79<br>(0.30, 2.10)<br>0.637 |  |
| 4 (11-80 exams)                                                | 1.22<br>(0.40, 3.78)<br>0.728 |      | 2.00<br>(0.59, 6.75)<br>0.264  |  | 2.04<br>(0.60, 6.92)<br>0.252  |  | 1.17<br>(0.40, 3.41)<br>0.771 |  |
| Correctly predicted specified pelvic floor disorder prevalence |                               |      |                                |  |                                |  |                               |  |
| No                                                             | Ref                           |      | Ref                            |  | Ref                            |  | Ref                           |  |
| Yes                                                            | 1.96<br>(0.64, 6.02)<br>0.239 |      | 0.34<br>(0.093, 1.21)<br>0.095 |  | 0.67<br>(0.24, 1.89)<br>0.454  |  | 0.45<br>(0.19, 1.08)<br>0.074 |  |
| Rate of referral for specified pelvic floor disorder           |                               |      |                                |  |                                |  |                               |  |
| >50%                                                           | Ref                           |      | Ref                            |  | Ref                            |  | Ref                           |  |
| ≥ 50%                                                          | 0.46<br>(0.18, 1.17)<br>0.104 |      | 0.625<br>(0.17, 2.29)<br>0.478 |  | 1.30<br>(0.34, 4.97)<br>0.700  |  | 0.75<br>(0.35, 1.60)<br>0.452 |  |
| Urogynecologist at practice/institution                        |                               |      |                                |  |                                |  |                               |  |
| Yes                                                            | Ref                           |      | Ref                            |  | Ref                            |  | Ref                           |  |
| No                                                             | <b>3.18</b>                   | 0.97 | 1.75                           |  | 2.22                           |  | 1.92                          |  |

|                                          |                                                     |                                |                                                     |                                                     |                                                     |                                |                                                    |                               |
|------------------------------------------|-----------------------------------------------------|--------------------------------|-----------------------------------------------------|-----------------------------------------------------|-----------------------------------------------------|--------------------------------|----------------------------------------------------|-------------------------------|
|                                          | <b>(1.25, 8.08)</b><br><b>0.015</b>                 | (0.20, 4.60)<br>0.965          | (0.66, 4.60)<br>0.260                               |                                                     | (0.83, 5.93)<br>0.110                               |                                | (0.89, 4.15)<br>0.098                              |                               |
| Urologist at practice/institution        |                                                     |                                |                                                     |                                                     |                                                     |                                |                                                    |                               |
| Yes                                      | Ref                                                 |                                | Ref                                                 |                                                     | Ref                                                 |                                | Ref                                                |                               |
| No                                       | <b>3.10</b><br><b>(1.24, 7.75)</b><br><b>0.016</b>  | 0.68<br>(0.13, 3.58)<br>0.645  | 1.84<br>(0.67, 5.09)<br>0.238                       |                                                     | 2.33<br>(0.86, 6.32)<br>0.097                       |                                | 1.28<br>(0.55, 2.97)<br>0.572                      |                               |
| Female urologist at practice/institution |                                                     |                                |                                                     |                                                     |                                                     |                                |                                                    |                               |
| Yes                                      | Ref                                                 |                                | Ref                                                 |                                                     | Ref                                                 |                                | Ref                                                |                               |
| No                                       | <b>5.10</b><br><b>(1.44, 18.08)</b><br><b>0.012</b> | 3.91<br>(0.83, 18.51)<br>0.086 | <b>6.31</b><br><b>(1.40, 28.54)</b><br><b>0.017</b> | <b>5.51</b><br><b>(1.15, 26.33)</b><br><b>0.033</b> | <b>3.86</b><br><b>(1.07, 13.98)</b><br><b>0.039</b> | 3.46<br>(0.91, 13.11)<br>0.068 | <b>2.54</b><br><b>(1.08, 6.00)</b><br><b>0.034</b> | 2.01<br>(0.78, 5.20)<br>0.149 |
| Gynecologist at practice/institution     |                                                     |                                |                                                     |                                                     |                                                     |                                |                                                    |                               |
| Yes                                      | Ref                                                 |                                | Ref                                                 |                                                     | Ref                                                 |                                | Ref                                                |                               |
| No                                       | <b>3.33</b><br><b>(1.18, 9.39)</b><br><b>0.023</b>  | 1.20<br>(0.27, 5.27)<br>0.809  | 1.26<br>(0.33, 4.77)<br>0.737                       |                                                     | 1.22<br>(0.32, 4.65)<br>0.766                       |                                | 1.87<br>(0.70, 5.01)<br>0.215                      |                               |

Difficulty of referral was defined as a dichotomous variable, whereby all providers that responded that they were indifferent, referral was somewhat difficult, and very difficult on the Likert scale were designated as having difficulty referring for pelvic floor disorders. \* variables that were not included in multivariate logistic regression, despite statistical significance in chi-square analysis, as variable perfectly predicted outcome

Abbreviations: POP, pelvic organ prolapse; SUI, stress urinary incontinence; OAB, overactive bladder; FI, fecal incontinence; COR, crude odds ratio; AOR, adjusted odds ratios; Ref, reference category; CI, confidence interval
